# Supplementary material for: A Three-Reagent “Green” Paper-Based Analytical Device for Solid-Phase Spectrometric and Colorimetric Determination of Dihydroquercetin
Source: MDPI journal article supplement (doi:10.3390/s22082893), 2022-04-09
Supplement: s1 [file s1]

# Supplementary Material

Communication

## A Three-Reagent “Green” Paper-Based Analytical Device for Solid-Phase Spectrometric and Colorimetric Determination of Dihydroquercetin

Vladimir V. Apyari <sup>1,\*</sup>, Aleksei A. Furletov <sup>1</sup>, Vyacheslav I. Kalinin <sup>1</sup>, Stanislava G. Dmitrienko <sup>1</sup> and Yury A. Zolotov <sup>1,2</sup>

<sup>1</sup> Department of Chemistry, Lomonosov Moscow State University, Leninskie Gory, 1/3, 119991 Moscow, Russia; aleksei\_furletov@mail.ru (A.A.F.); workm2k@gmail.com (V.I.K.); dmitrienko@analyt.chem.msu.ru (S.G.D.); zolotov@analyt.chem.msu.ru (Y.A.Z.)

<sup>2</sup> Kurnakov Institute of General and Inorganic Chemistry, Russian Academy of Sciences, Leninsky Avenue, 31, 119991 Moscow, Russia

\* Correspondence: apyari@mail.ru

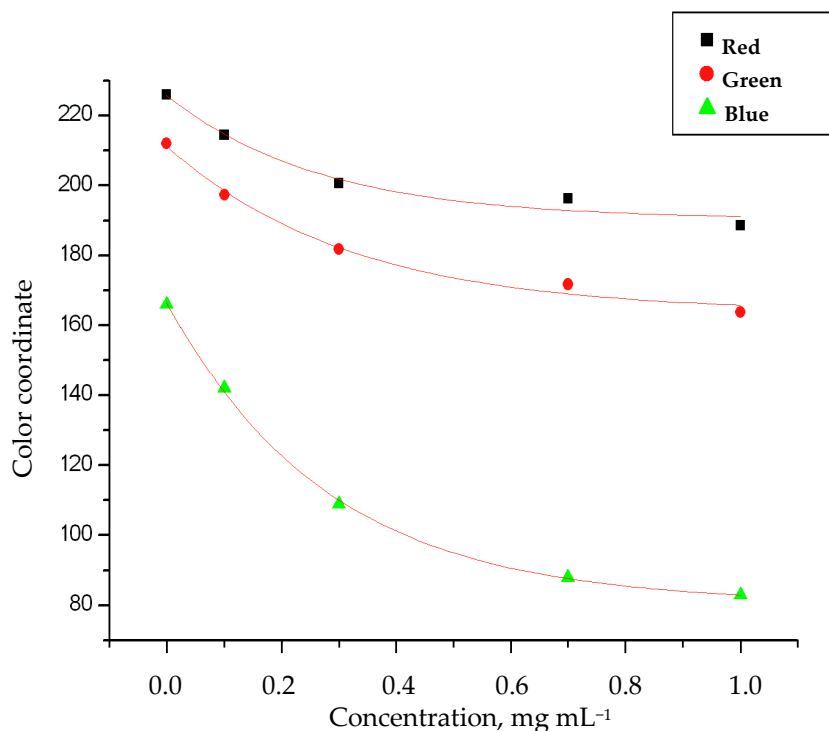

**Figure S1.** Colorimetric calibration graphs based on the interaction between 4-NPD and dihydroquercetin.
